# Supplementary material for: Local De Novo Assembly of RAD Paired-End Contigs Using Short Sequencing Reads
Source: PLoS One. 2011 Apr 13;6(4):e18561. doi: 10.1371/journal.pone.0018561 (PMC3076424; doi:10.1371/journal.pone.0018561)
Supplement: File S12 — Stickleback fosmid RAD-PE. This text file contains the perl scripts used to assemble contigs from the stickleback fosmid partial-digest RAD-PE library sequence reads and create File S5. (PL) [file pone.0018561.s012.pl]

#!/usr/bin/perl -X


$file1 = "/home/eric-johnson/scratch/091204/s_8vspCC1.align";
$read_length = 40;
$trim_length = 0;

print "reading pCC reads\n";
	 open (INFILE, "<$file1")
		or die "Can't open: $file $!\n";

	while (<INFILE>) {
		@l = split("\t",$_);
		if ($l[7] eq ">pCC1fos") {
			$l[2] = substr($l[2],$trim_length,$read_length);
			$bad_pcc{$l[2]} = 1;
		}
	}
	close INFILE;


$expected_length = 400;
$bad_threshold = 25;

$bc_seqs{'GATC'} = 1;
$bc_seqs{'CATG'} = 1;
$barcode_ID{'GATC'} = "GATC";
$barcode_ID{'CATG'} = "CATG";

$bc_length = 4;

$bc_list = "(";
foreach $S1_bc (keys %bc_seqs) {
	$bc_list .= $S1_bc . "|";
}
$bc_list = substr($bc_list,0,-1);
$bc_list .= ")";
	$file = "/home/eric-johnson/scratch/091204/s_8_1_sequence.txt";
	$file2 = "/home/eric-johnson/scratch/091204/s_8_2_sequence.txt";

print "scanning $file for RAD sites\n";
	 open (INFILE, "<$file")
		or die "Can't open: $file $!\n";

	while (<INFILE>) {
		$seq_line = <INFILE>;
		chop $seq_line;
		$_ = <INFILE>;
		$qual_line = <INFILE>;
		chop $qual_line;
		$bad = ($qual_line =~ tr/([:-J]//);
		if ($bad > $bad_threshold) {$bad_read{$barcode_ID{$bc}}++;} else {
				$bc = substr($seq_line,0,$bc_length);
				if ($bc =~ /^$bc_list/)  {
					$id = $barcode_ID{$bc};
					if ($id ne "") {
						$read = substr($seq_line,$trim_length,$read_length);
						if (!(exists $bad_pcc{$read})) {
							$count_S1++;
							$RAD{$read}++;
						}
					}
				}			
		}
				

	}
	close INFILE;


 
 
 
 print "$count_S1 sequence reads for GATC\n";
 print "Removed bad reads from GATC\n";
 foreach $id (sort keys %bad_read) {
 	print "$id $bad_read{$id}\n";
 }
 
 # histogram of read counts
	foreach $k (keys %RAD) {
		$bin = int($RAD{$k}/10);
		$histo[$bin]++;
		
	}
	
	print "histogram of read counts\n";
	for ($x = 0; $x < @histo; $x++) {
		if ($histo[$x] > 0) {
			$v = 10 * $x;
			print "$v ";
			if ($histo[$x] > 0) { print "$histo[$x]\n";} else { print "00\n";}
		}
	}

 	
 	
 	$clot_min = 30;
  	foreach $r (keys %RAD) {
		if (($RAD{$r} >= $clot_min) && (!(exists $used{$r})) ) {
			#print "$RAD{$r}\n";
			$good_RAD{$r} = 1;
			$count_good++;
		}
	}
	print "$count_good sequences passed the filters\n";
	%RAD = ();

$bc2_list{'CAT'} = "BP_7EZ"; 
#$bc2_list{'CTA'} = "RS_Sox9";
#$bc2_list{'AGC'} = "pipefish14";
#$bc2_list{'TCG'} = "pipefish16";
$bc2_length = 3;
$trim2_length = 4;

$bc_list = "(";
foreach $S1_bc (keys %bc_seqs) {
	$bc_list .= $S1_bc . "|";
}
$bc_list = substr($bc_list,0,-1);
$bc_list .= ")";
	$file = "/home/eric-johnson/scratch/091204/s_8_1_sequence.txt";
	$file2 = "/home/eric-johnson/scratch/091204/s_8_2_sequence.txt";

print "Gathering paired end reads from $file\n";

	open (FILE1, "<$file")
		or die "Can't open: $file $!";
		
	open (FILE2, "<$file2")
		or die "Can't open: $file2 $!";
		
	while (<FILE1>) {
		$read1 = <FILE1>;
		chop $read1;
		$bc = substr($read1,0,$bc_length);
		#$first = substr($read1,0,$read_length);
		$first = substr($read1,$trim_length,$read_length);
		$_ = <FILE1>;
		$_ = <FILE1>;
		
		$_ = <FILE2>;
		$read2 = <FILE2>;
		chop $read2;
		$bc2 = substr($read2,0,$bc2_length);
		$read2 = substr($read2,$trim2_length);
		$id = <FILE2>;
		chop $id;
		$qual = <FILE2>;
		chop $qual;
		$qual = substr($qual,$trim2_length);
		if (($bc =~ /^$bc_list/) ){ # && (exists $bc2_list{$bc2}))  {
			if (exists $good_RAD{$first}) {
				$bad = ($qual =~ tr/([:-J]//);
				#print "$first\n$read2\n$bad\n\n";
				if ($bad < 25) {
					push @{$clots{$first}},$id;
					$id_qual{$id} = $qual;
					$id_second{$id} = $read2;
				}
				#$num_reads{$first}++;
				#print "$first 2 $read2\n";
			}
		}
		
	}
	close FILE1;
	close FILE2;
	
		$throttle_threshold = 1500;
		foreach $r (keys %clots) {
			$num_reads_in_clot = scalar @{$clots{$r}};
			if ($num_reads_in_clot > $throttle_threshold) {
				@new_set = ();
				for ($x = 0; $x < $throttle_threshold; $x++) {
					$i = int(rand($num_reads_in_clot));
					push @new_set, $clots{$r}[$i];
				}
				@{$clots{$r}} = @new_set;
			}
		}
	
	$full_index_file = "/home/eric-johnson/scratch/091204/LARPtempall.txt";
	 open (FILEOUT, ">$full_index_file")
				or die "Can't open: $full_index_file $!\n";
	close FILEOUT;
	#write a stack file for all rad sites
		$ch = 0;
		foreach $r (keys %clots) {
			%kmers = ();
			$count++;
			#if (($count/100) == int($count/100)) {
			#	$report = 1;
			#}
			$second_count = 0;
			$bad_count = 0;
			$kmer_length = 21;
			 open (FILEOUT, ">>$full_index_file")
				or die "Can't open: $index_file $!\n";
			print FILEOUT "START\n$r\n";
			foreach $id (@{$clots{$r}}) {
				$bad = ($id_qual{$id} =~ tr/([:-J]//);
				if ($bad < 40) {
					#look for abundant kmers
					$l = length($id_second{$id});
					$dont_print = 0;
					for ($x = 0; $x < ($l - $kmer_length); $x++) {
						$k = substr($id_second{$id},$x,$kmer_length);
						$kmers{$k}++;
						if ($kmers{$k} > 30) {
							$dont_print = 1;
							
						}
					}
					$second_count++;
					if ($dont_print == 0) {
						print FILEOUT ">" . "$count" . "_" . "$second_count" . "_" . "$r\n$id_second{$id}\n";
					} else {
						$smoothed++;
					}
				} else {$bad_count++;}
			}
			print FILEOUT "END\n";
			close FILEOUT;
		}
		
		print "$smoothed reads removed for smoothing\n";
		
	%clots = ();
	%id_qual = ();
	%id_second = ();
	
	$max_child = 3;
	$first = 1;
	$contig_file = "/home/eric-johnson/scratch/091204/stickle_fosmid_contig_RADPE.txt";
	open (FILECONTIGS, ">$contig_file")
		or die "Can't open: $contig_file $!";
	close FILECONTIGS;
	$best_contig_file = "/home/eric-johnson/scratch/091204/stickle_fosmid_contig_RADPE_bestcover.txt";
	open (BESTCONTIGS, ">$best_contig_file")
		or die "Can't open: $best_contig_file $!";
	close BESTCONTIGS;

	open (FILEIN, "<$full_index_file")
		or die "Can't open: $full_index_file $!";
	
	
$ch = 0;
	$report = 0;
	$count = 0;
	while (<FILEIN>) {
		chop;
		if ($_ eq "START") {
			$index_file = "/home/eric-johnson/scratch/091204/contigs_temp" . $ch . ".txt";
			 open (FILEOUT, ">$index_file")
				or die "Can't open: $index_file $!\n";
			close FILEOUT;
			$_ = <FILEIN>;
			chop;
			$r = $_;
			$second_count = 0;
		} else {	# if START
			if ($_ eq "END") {
				$count++;
				if (($count/100) == int($count/100)) {
					$report = 1;
					$track++;
					#if ($track == 10) {last;}
				}
				$r_number[$ch] = $count;
				$r_site[$ch] = $r;
				$read_count_file[$ch] = $second_count;
				$ch++;
				if ($ch >= $max_child) {
				
					#do velvet
					@pids = ();
					for ($ch = 0; $ch < $max_child; $ch++) {
						defined (my $pid = fork) or die "Cannot fork: $!\n";
						if ($pid) {
						  push @pids, $pid;
						  next;
						}
						$file_coverage = ($read_count_file[$ch] * $read_length_tracker[$ch])/$expected_length;
						$exp_cov = $file_coverage + 40;
						if ($file_coverage > 12) {$file_coverage = 12;}
						$index_key = int(11 + ($file_coverage));
						$t = "/home/eric-johnson/velvet_0.7.55/velveth /home/eric-johnson/scratch/091204/temp" . $ch . " " . $index_key . " /home/eric-johnson/scratch/091204/contigs_temp" . $ch . ".txt > /home/eric-johnson/scratch/091204/velvetlog" . $ch . ".txt";
						system($t);
						$t = "/home/eric-johnson/velvet_0.7.55/velvetg /home/eric-johnson/scratch/091204/temp" . $ch . " -exp_cov 100 -cov_cutoff 2 -min_contig_lgth 150 > /home/eric-johnson/scratch/091204/velvetlog" . $ch . ".txt";
						system($t);
						
						$index_key = 13;
						$t = "/home/eric-johnson/velvet_0.7.55/velveth /home/eric-johnson/scratch/091204/templ" . $ch . " " . $index_key . " /home/eric-johnson/scratch/091204/contigs_temp" . $ch . ".txt > /home/eric-johnson/scratch/091204/velvetlog" . $ch . ".txt";
						system($t);
						$t = "/home/eric-johnson/velvet_0.7.55/velvetg /home/eric-johnson/scratch/091204/templ" . $ch . " -exp_cov 100 -cov_cutoff 2 -min_contig_lgth 150 > /home/eric-johnson/scratch/091204/velvetlog" . $ch . ".txt";
						system($t);

						$index_key = 27;
						$t = "/home/eric-johnson/velvet_0.7.55/velveth /home/eric-johnson/scratch/091204/temph" . $ch . " " . $index_key . " /home/eric-johnson/scratch/091204/contigs_temp" . $ch . ".txt > /home/eric-johnson/scratch/091204/velvetlog" . $ch . ".txt";
						system($t);
						$t = "/home/eric-johnson/velvet_0.7.55/velvetg /home/eric-johnson/scratch/091204/temph" . $ch . " -exp_cov 100 -cov_cutoff 2 -min_contig_lgth 150 > /home/eric-johnson/scratch/091204/velvetlog" . $ch . ".txt";
						system($t);

						
						exit(0);
					}
					for ($ch = 0; $ch < $max_child; $ch++) {
						waitpid $pids[$ch], 0;
						#grab contig from velvet
						$velvet_contig = "/home/eric-johnson/scratch/091204/temp" . $ch . "/contigs.fa";
						open (VELVETCONTIG, "<$velvet_contig")
							or die "Can't open: $velvet_contig $!";
						
						
						$report_done = 0;
						@contig_test = ();
						@contig_info = ();
						$contig_count = -1;
						@temp_length_counter = ();
						@contig_test_cover = ();
						@contig_test_cover_print = ();
						while (<VELVETCONTIG>) {
							
								$l = $_;
								chop $l;
								if ($l =~ />/) {
									$contig_count++;
									#if ($report_done == 1) {$report = 0;}
									$h = substr($l,1);
									open (FILECONTIGS, ">>$contig_file")
										or die "Can't open: $contig_file $!";
									
									if ($first == 0) {
										print FILECONTIGS "\n";
										
									} else {
										$first = 0;
									}
									$contig_info[$contig_count] = ">" . "$r_number[$ch]" . "_" . "$r_site[$ch]" . "_" . "$h";
									print FILECONTIGS ">" . "$r_number[$ch]" . "_" . "$r_site[$ch]" . "_" . "$h\n";
									close FILECONTIGS;
									$contig_test_cover_print[1] .= "\n>" . "$r_number[$ch]" . "_" . "$r_site[$ch]" . "_" . "$h\n";
									if ($report == 1) {
										print br;
										$file_coverage = ($read_count_file[$ch] * $read_length_tracker[$ch])/$expected_length;
										if ($file_coverage > 12) {$file_coverage = 12;}
										$index_key = int(11 + ($file_coverage));
										print "$read_count_file[$ch] $file_coverage $index_key\n";
										print ">" . "$r_number[$ch]" . "_" . "$r_site[$ch]" . "_" . "$h\n";
									}
								} else {
									open (FILECONTIGS, ">>$contig_file")
										or die "Can't open: $contig_file $!";
									print FILECONTIGS "$l";
									close FILECONTIGS;
									$contig_test[$contig_count] .= $l;
									$contig_test_cover[1] .= $l;
									$contig_test_cover_print[1] .= $l;
									if ($report == 1) {
										print "$l";
										#$report_done = 1;
									}
									
							   }
							   
						} #while velvetcontig
						
						close VELVETCONTIG;
						
						$velvet_contig = "/home/eric-johnson/scratch/091204/templ" . $ch . "/contigs.fa";
						open (VELVETCONTIG, "<$velvet_contig")
							or die "Can't open: $velvet_contig $!";
						
						
						$report_done = 0;
						while (<VELVETCONTIG>) {
							
								$l = $_;
								chop $l;
								if ($l =~ />/) {
									$contig_count++;
									#if ($report_done == 1) {$report = 0;}
									$h = substr($l,1);
									open (FILECONTIGS, ">>$contig_file")
										or die "Can't open: $contig_file $!";
									
									if ($first == 0) {
										print FILECONTIGS "\n";
										
									} else {
										$first = 0;
									}	
									$contig_info[$contig_count] = ">" . "$r_number[$ch]" . "_" . "$r_site[$ch]" . "_" . "$h";
									print FILECONTIGS ">" . "$r_number[$ch]" . "_" . "$r_site[$ch]" . "_" . "$h\n";
									close FILECONTIGS;
									$contig_test_cover_print[2] .= "\n>" . "$r_number[$ch]" . "_" . "$r_site[$ch]" . "_" . "$h\n";
									if ($report == 1) {
										print br;
										$file_coverage = ($read_count_file[$ch] * $read_length_tracker[$ch])/$expected_length;
										if ($file_coverage > 12) {$file_coverage = 12;}
										$index_key = 13;
										print "$read_count_file[$ch] $file_coverage $index_key\n";
										print ">" . "$r_number[$ch]" . "_" . "$r_site[$ch]" . "_" . "$h\n";
									}
								} else {
									open (FILECONTIGS, ">>$contig_file")
										or die "Can't open: $contig_file $!";
									print FILECONTIGS "$l";
									close FILECONTIGS;
									$contig_test[$contig_count] .= $l;
									$contig_test_cover[2] .= $l;
									$contig_test_cover_print[2] .= $l;
									if ($report == 1) {
										print "$l";
										#$report_done = 1;
									}
									
							   }
							   
						} #while velvetcontig
						
						close VELVETCONTIG;
						
						$velvet_contig = "/home/eric-johnson/scratch/091204/temph" . $ch . "/contigs.fa";
						open (VELVETCONTIG, "<$velvet_contig")
							or die "Can't open: $velvet_contig $!";
						
						
						$report_done = 0;
						while (<VELVETCONTIG>) {
							
								$l = $_;
								chop $l;
								if ($l =~ />/) {
									$contig_count++;
									#if ($report_done == 1) {$report = 0;}
									$h = substr($l,1);
									open (FILECONTIGS, ">>$contig_file")
										or die "Can't open: $contig_file $!";
									
									if ($first == 0) {
										print FILECONTIGS "\n";
										
									} else {
										$first = 0;
									}
									$contig_info[$contig_count] = ">" . "$r_number[$ch]" . "_" . "$r_site[$ch]" . "_" . "$h";
									print FILECONTIGS ">" . "$r_number[$ch]" . "_" . "$r_site[$ch]" . "_" . "$h\n";
									close FILECONTIGS;
									$contig_test_cover_print[3] .= "\n>" . "$r_number[$ch]" . "_" . "$r_site[$ch]" . "_" . "$h\n";
									if ($report == 1) {
										print br;
										$file_coverage = ($read_count_file[$ch] * $read_length_tracker[$ch])/$expected_length;
										if ($file_coverage > 12) {$file_coverage = 12;}
										$index_key = 31;
										print "$read_count_file[$ch] $file_coverage $index_key\n";
										print ">" . "$r_number[$ch]" . "_" . "$r_site[$ch]" . "_" . "$h\n";
									}
								} else {
									open (FILECONTIGS, ">>$contig_file")
										or die "Can't open: $contig_file $!";
									print FILECONTIGS "$l";
									close FILECONTIGS;
									$contig_test[$contig_count] .= $l;
									$contig_test_cover[3] .= $l;
									$contig_test_cover_print[3] .= $l;
									if ($report == 1) {
										print "$l";
										#$report_done = 1;
									}
									
							   }
							   
						} #while velvetcontig
						
						close VELVETCONTIG;
						
						open (BESTCONTIGS, ">>$best_contig_file")
								or die "Can't open: $best_contig_file $!";
						
						if ( (length($contig_test_cover[1]) >= length($contig_test_cover[2])) && (length($contig_test_cover[1]) >= length($contig_test_cover[3])) ) {
							$contig_test_cover_print[1] = substr($contig_test_cover_print[1],1);
							print BESTCONTIGS "$contig_test_cover_print[1]\n";
							print "1\n";
						} else {
							if (length($contig_test_cover[2]) >= length($contig_test_cover[3]))	{
								$contig_test_cover_print[2] = substr($contig_test_cover_print[2],1);
								print BESTCONTIGS "$contig_test_cover_print[2]\n";
								print "2\n";
							} else {
								$contig_test_cover_print[3] = substr($contig_test_cover_print[3],1);
								print BESTCONTIGS "$contig_test_cover_print[3]\n";
								print "3\n";
							}
						}
						
						
					} #for ch
					$report = 0;
					$ch = 0;
					
					
					
					
					#end velvet
				
				} #if ch > max
			} else { #if end
				open (FILEOUT, ">>$index_file")
					or die "Can't open: $index_file $!\n";
				print FILEOUT "$_\n";
				$num_reads{$r}++;
				$_ = <FILEIN>;
				chop;
				print FILEOUT "$_\n";
				close FILEOUT;
				$second_count++;
				$read_length_tracker[$ch] = length $_;
			}
		} # else if start
	} # while filein		

		
	
		
	
	
	@histo = ();
	
	$max_cov = 0;
	$max_length = 0;

	open (FILE, "<$contig_file")
		or die "Can't open: $contig_file $!";

		#$first = <FILE>;
		while (<FILE>) {
			$info = $_;
			chop $info;
			@i = split("_",$info);
			$cov = $i[7];
			$read = $i[1];
		#	print "$info $num_reads{$read}\n";
			$c = <FILE>;
			$l = length $c;
		#	print "$l $c\n";
			$bin = int($l/10);
			#print "$c $l $bin\n";
			$histo[$bin]++;
			push @coverage, $num_reads{$read};
			push @length, $l;
			if ($l > $max_length) {$max_length = $l;}
			if ($num_reads{$read} > $max_cov) {$max_cov = $num_reads{$read};}
			
		}
	close FILE;
	
	
	print br;
	$histo_max = 0;
	for ($x = 10; $x < @histo; $x++) {
		if ($histo[$x] > $histo_max) { $histo_max = $histo[$x];}
	}
	
	$histo_adjust = $histo_max/100;
	
	for ($x = 10; $x < @histo; $x++) {
			$b = 10 * $x;
			print "$b ";
			$ticks = int($histo[$x]/$histo_adjust);
			for ($y = 0; $y < $ticks; $y++) {
				print "*";
			}
			print " $histo[$x]\n";
	}


	
  	exit(0);
	
  	
  	
 
 
 sub revcomp {
  my $dna = @_[0];
  my $revcomp = reverse($dna);

  $revcomp =~ tr/ACGTacgt/TGCAtgca/;

  return $revcomp;
}

sub degen {
	my $dna = @_[0];
 	my $len = length($dna);
 	my $letter = "";
 	my @degs = ();
 	my @unique_degs = ();
 	my $deg = "";
 	my $left_side = "";
 	my $right_side = "";
 	my %seen =() ;

	for ($letter = 0; $letter < $len; $letter++) {
		$left_side = substr($dna,0,$letter);
		$right_side = substr($dna,$letter+1);
		$deg = $left_side . "A" . $right_side;
		push @degs, $deg;
		$deg = $left_side . "T" . $right_side;
		push @degs, $deg;
		$deg = $left_side . "C" . $right_side;
		push @degs, $deg;
		$deg = $left_side . "G" . $right_side;
		push @degs, $deg;
	}
	@unique_degs = grep { ! $seen{$_}++ } @degs ;	    

  return @unique_degs;
}
