# Supplementary material for: Local De Novo Assembly of RAD Paired-End Contigs Using Short Sequencing Reads
Source: PLoS One. 2011 Apr 13;6(4):e18561. doi: 10.1371/journal.pone.0018561 (PMC3076424; doi:10.1371/journal.pone.0018561)
Supplement: File S14 — E. coli Long-Insert RAD-PE. This text file contains the perl scripts used to assemble contigs from the E. coli long-insert RAD-PE library sequence reads and create File S10. (PL) [file pone.0018561.s014.pl]

#!/usr/bin/perl -X


$expected_length = 3500;
$bad_threshold = 25;
$read_length1 = 34;
$trim_length1 = 5;
$read_length2 = 80;
$trim_length2 = 0;

$bc_seqs{'CCATATGCAGG'} = 1;
$barcode_ID{'CCATATGCAGG'} = "Sbf";

$bc_length = 11;

$bc_list = "(";
foreach $S1_bc (keys %bc_seqs) {
	$bc_list .= $S1_bc . "|";
}
$bc_list = substr($bc_list,0,-1);
$bc_list .= ")";
       $file = "/home/eric-johnson/scratch/100626/s_7_1_sequence.txt";
        $file2 = "/home/eric-johnson/scratch/100626/s_7_2_sequence.txt";

print "scanning $file for RAD sites\n";
	 open (INFILE, "<$file")
		or die "Can't open: $file $!\n";

	while (<INFILE>) {
		$seq_line = <INFILE>;
		chop $seq_line;
		$_ = <INFILE>;
		$qual_line = <INFILE>;
		chop $qual_line;
		$bad = ($qual_line =~ tr/([:-J]//);
		if ($count_S1 < 2000000) {
			if ($bad > $bad_threshold) {$bad_read{$barcode_ID{$bc}}++;} else {
					$bc = substr($seq_line,0,$bc_length);
					if ($bc =~ /^$bc_list/)  {
						$id = $barcode_ID{$bc};
						if ($id ne "") {
							$read = substr($seq_line,$trim_length1,$read_length1);
								$count_S1++;
								$RAD{$read}++;
						}
					}			
			}
		}
				

	}
	close INFILE;


	$filetwo = "/home/eric-johnson/scratch/100802/s_8_1_sequence.txt";
	$filetwo2 = "/home/eric-johnson/scratch/100802/s_8_2_sequence.txt";

print "scanning $filetwo for RAD sites\n";
	 open (INFILE, "<$filetwo")
		or die "Can't open: $file $!\n";

	while (<INFILE>) {
		$seq_line = <INFILE>;
		chop $seq_line;
		$_ = <INFILE>;
		$qual_line = <INFILE>;
		chop $qual_line;
		$bad = ($qual_line =~ tr/([:-J]//);
		if ($count_S1 < 2000000) {
			if ($bad > $bad_threshold) {$bad_read{$barcode_ID{$bc}}++;} else {
					$bc = substr($seq_line,0,$bc_length);
					if ($bc =~ /^$bc_list/)  {
						$id = $barcode_ID{$bc};
						if ($id ne "") {
							$read = substr($seq_line,$trim_length1,$read_length1);
								$count_S1++;
								$RAD{$read}++;
						}
					}			
			}
		}
				

	}
	close INFILE;


 
 
 
 print "$count_S1 sequence reads\n";
 print "Removed bad reads\n";
 foreach $id (sort keys %bad_read) {
 	print "$id $bad_read{$id}\n";
 }
 
 # histogram of read counts
	foreach $k (keys %RAD) {
		$bin = int($RAD{$k}/200);
		$histo[$bin]++;
		
	}
	
	print "histogram of read counts\n";
	for ($x = 0; $x < @histo; $x++) {
		if ($histo[$x] > 0) {
			$v = 200 * $x;
			print "$v ";
			if ($histo[$x] > 0) { print "$histo[$x]\n";} else { print "00\n";}
		}
	}

 	
 	#clean up
 		$clot_max = 35000;
 		print "Removing contigs with greater than $clot_max reads\n";
 		foreach $k (keys %RAD) {
			if ($RAD{$k} > $clot_max) {
				push @high_clots, $k;
			}
		}

		foreach $k (@high_clots) {
				$filtered = $filtered + $RAD{$k};
				delete $RAD{$k};				
				@deg_keys = &degen($k);
				foreach $d_key (@deg_keys) {
					if (exists $RAD{$d_key}) {
						$filtered = $filtered + $RAD{$d_key};
						delete $RAD{$d_key};
					}
					
				}	
			if ($k =~ m/N/) {
				delete $RAD{$k};
			}
		}
		print "removed $filtered repetitive tags\n";
 	
 	$clot_min = 1000;
  	foreach $r (keys %RAD) {
		if (($RAD{$r} >= $clot_min) && (!(exists $used{$r})) ) {
			#print "$RAD{$r}\n";
			$good_RAD{$r} = 1;
			$count_good++;
		}
	}
	print "$count_good sequences passed the filters\n";
	%RAD = ();

$count_again = 0;

	
	
 print "Gathering paired end reads from $filetwo\n";
 
 	open (FILE1, "<$filetwo")
 		or die "Can't open: $filetwo $!";
 		
 	open (FILE2, "<$filetwo2")
 		or die "Can't open: $filetwo2 $!";
 		
 	while (<FILE1>) {
 		$read1 = <FILE1>;
 		chop $read1;
 		$bc = substr($read1,0,$bc_length);
 		$first = substr($read1,$trim_length1,$read_length1);
 		$_ = <FILE1>;
 		$_ = <FILE1>;
 		
 		$_ = <FILE2>;
 		$read2 = <FILE2>;
 		chop $read2;
 		$id = <FILE2>;
 		chop $id;
 		$qual = <FILE2>;
 		chop $qual;
 		if ($count_again < 2000000) {
 			if (($bc =~ /^$bc_list/) && (exists $good_RAD{$first})) {
 				$bad = ($qual =~ tr/([:-J]//);
 				#print "$first\n$read2\n$bad\n\n";
 				if ($bad < 40) {
 					push @{$clots{$first}},$id;
 					$id_qual{$id} = $qual;
 					$id_second{$id} = $read2;
 					$count_again++;
 				}
 				#$num_reads{$first}++;
 				#print "$first 2 $read2\n";
 			}
 		}
 		
 	}
 	close FILE1;
 	close FILE2;

print "Gathering paired end reads from $file\n";

	open (FILE1, "<$file")
		or die "Can't open: $file $!";
		
	open (FILE2, "<$file2")
		or die "Can't open: $file2 $!";
		
	while (<FILE1>) {
		$read1 = <FILE1>;
 		chop $read1;
 		$bc = substr($read1,0,$bc_length);
 		$first = substr($read1,$trim_length1,$read_length1);
 		$_ = <FILE1>;
 		$_ = <FILE1>;
 		
 		$_ = <FILE2>;
 		$read2 = <FILE2>;
 		chop $read2;
 		$id = <FILE2>;
 		chop $id;
 		$qual = <FILE2>;
 		chop $qual;
 		if ($count_again < 2000000) {
 			if (($bc =~ /^$bc_list/) && (exists $good_RAD{$first})) {
				$bad = ($qual =~ tr/([:-J]//);
				#print "$first\n$read2\n$bad\n\n";
				if ($bad < 40) {
					push @{$clots{$first}},$id;
					$id_qual{$id} = $qual;
					$id_second{$id} = $read2;
					$count_again++;
				}
				#$num_reads{$first}++;
				#print "$first 2 $read2\n";
			}
		}
		
	}
	close FILE1;
	close FILE2;

	

	
	$full_index_file = "/home/eric-johnson/scratch/100802/ecoliLARPtempall_smooth_long.txt";
	 open (FILEOUT, ">$full_index_file")
				or die "Can't open: $full_index_file $!\n";
	close FILEOUT;
	#write a stack file for all rad sites
		$kmer_length = 21;
		$ch = 0;
		foreach $r (keys %clots) {
			$count++;
			$second_count = 0;
			$bad_count = 0;
			%kmers = ();
			 open (FILEOUT, ">>$full_index_file")
				or die "Can't open: $index_file $!\n";
			print FILEOUT "START\n$r\n";
			foreach $id (@{$clots{$r}}) {
				$bad = ($id_qual{$id} =~ tr/([:-J]//);
				if ($bad < 40) {
					#look for abundant kmers
					$l = length($id_second{$id});
					$dont_print = 0;
					for ($x = 0; $x < ($l - $kmer_length); $x++) {
						$k = substr($id_second{$id},$x,$kmer_length);
						$kmers{$k}++;
						if ($kmers{$k} > 30) {
							$dont_print = 1;
							
						}
					}
				
					$second_count++;
					if ($dont_print == 0) {
						print FILEOUT ">" . "$count" . "_" . "$second_count" . "_" . "$r\n$id_second{$id}\n";
					} else {
						$smoothed++;
					}
				} else {$bad_count++;}
			}
			print FILEOUT "END\n";
			close FILEOUT;
		}
		
		print "$smoothed reads removed for smoothing\n";
	%clots = ();
	%id_qual = ();
	%id_second = ();
	
	$max_child = 3;
	$first = 1;
	$contig_file = "/home/eric-johnson/scratch/100802/ecoli_PE_contig_smooth_long.txt";
	open (FILECONTIGS, ">$contig_file")
		or die "Can't open: $contig_file $!";
	close FILECONTIGS;
	
	open (FILEIN, "<$full_index_file")
		or die "Can't open: $full_index_file $!";
	
	
	$ch = 0;
	$report = 0;
	$count = 0;
	while (<FILEIN>) {
		chop;
		if ($_ eq "START") {
			$index_file = "/home/eric-johnson/scratch/100802/contigs_temp" . $ch . ".txt";
			 open (FILEOUT, ">$index_file")
				or die "Can't open: $index_file $!\n";
			close FILEOUT;
			$_ = <FILEIN>;
			chop;
			$r = $_;
			$second_count = 0;
		} else {	# if START
			if ($_ eq "END") {
				$count++;
				if (($count/100) == int($count/100)) {
					$report = 1;
				}
				$r_number[$ch] = $count;
				$r_site[$ch] = $r;
				$read_count_file[$ch] = $second_count;
				$ch++;
				if ($ch >= $max_child) {
				
					#do velvet
					@pids = ();
					for ($ch = 0; $ch < $max_child; $ch++) {
						defined (my $pid = fork) or die "Cannot fork: $!\n";
						if ($pid) {
						  push @pids, $pid;
						  next;
						}
						# first assemble with a long kmer length to go through bio repeats
						
						$index_key = 41;
						
						$t = "/home/eric-johnson/velvet_0.7.55/velveth /home/eric-johnson/scratch/100802/templ" . $ch . " " . $index_key . " /home/eric-johnson/scratch/100802/contigs_temp" . $ch . ".txt > /home/eric-johnson/scratch/100802/velvetlog" . $ch . ".txt";
						system($t);
						$t = "/home/eric-johnson/velvet_0.7.55/velvetg /home/eric-johnson/scratch/100802/templ" . $ch . " -exp_cov 100 -cov_cutoff 2 -min_contig_lgth 100 > /home/eric-johnson/scratch/100802/velvetlog" . $ch . ".txt";
						system($t);
						
						
						$file_coverage = ($read_count_file[$ch] * $read_length_tracker[$ch])/$expected_length;
						$exp_cov = $file_coverage + 40;
						if ($file_coverage > 12) {$file_coverage = 12;}
						$index_key = int(11 + (1 * $file_coverage));
						
						$t = "/home/eric-johnson/velvet_0.7.55/velveth /home/eric-johnson/scratch/100802/temp" . $ch . " " . $index_key . " -long /home/eric-johnson/scratch/100802/templ" . $ch . "/contigs.fa -short /home/eric-johnson/scratch/100802/contigs_temp" . $ch . ".txt > /home/eric-johnson/scratch/100802/velvetlog" . $ch . ".txt";
						system($t);
						$t = "/home/eric-johnson/velvet_0.7.55/velvetg /home/eric-johnson/scratch/100802/temp" . $ch . " -exp_cov 100 -cov_cutoff 2 -min_contig_lgth 100 > /home/eric-johnson/scratch/100802/velvetlog" . $ch . ".txt";
						system($t);
						exit(0);
					}
					for ($ch = 0; $ch < $max_child; $ch++) {
						waitpid $pids[$ch], 0;
						#grab contig from velvet
						$velvet_contig = "/home/eric-johnson/scratch/100802/temp" . $ch . "/contigs.fa";
						open (VELVETCONTIG, "<$velvet_contig")
							or die "Can't open: $velvet_contig $!";
						
						
						$report_done = 0;
						while (<VELVETCONTIG>) {
							
								$l = $_;
								chop $l;
								if ($l =~ />/) {
									#if ($report_done == 1) {$report = 0;}
									$h = substr($l,1);
									open (FILECONTIGS, ">>$contig_file")
										or die "Can't open: $contig_file $!";
									
									if ($first == 0) {
										print FILECONTIGS "\n";
										
									} else {
										$first = 0;
									}	
									print FILECONTIGS ">" . "$r_number[$ch]" . "_" . "$r_site[$ch]" . "_" . "$h\n";
									close FILECONTIGS;
									if ($report == 1) {
										print br;
										$file_coverage = ($read_count_file[$ch] * $read_length_tracker[$ch])/$expected_length;
										if ($file_coverage > 12) {$file_coverage = 12;}
										$index_key = int(11 + ($file_coverage));
										print "$read_count_file[$ch] $file_coverage $index_key\n";
										print ">" . "$r_number[$ch]" . "_" . "$r_site[$ch]" . "_" . "$h\n";
									}
								} else {
									open (FILECONTIGS, ">>$contig_file")
										or die "Can't open: $contig_file $!";
									print FILECONTIGS "$l";
									close FILECONTIGS;
									if ($report == 1) {
										print "$l";
										#$report_done = 1;
									}
									
							   }
							   
						} #while velvetcontig
						
						close VELVETCONTIG;
					} #for ch
					$report = 0;
					$ch = 0;
					
					
					
					
					#end velvet
				
				} #if ch > max
			} else { #if end
				open (FILEOUT, ">>$index_file")
					or die "Can't open: $index_file $!\n";
				print FILEOUT "$_\n";
				$num_reads{$r}++;
				$_ = <FILEIN>;
				chop;
				print FILEOUT "$_\n";
				close FILEOUT;
				$second_count++;
				$read_length_tracker[$ch] = length $_;
			}
		} # else if start
	} # while filein
		
	
	
	@histo = ();
	
	$max_cov = 0;
	$max_length = 0;

	open (FILE, "<$contig_file")
		or die "Can't open: $contig_file $!";

		#$first = <FILE>;
		while (<FILE>) {
			$info = $_;
			chop $info;
			@i = split("_",$info);
			$cov = $i[7];
			$read = $i[1];
		#	print "$info $num_reads{$read}\n";
			$c = <FILE>;
			$l = length $c;
		#	print "$l $c\n";
			$bin = int($l/500);
			#print "$c $l $bin\n";
			$histo[$bin]++;
			push @coverage, $num_reads{$read};
			push @length, $l;
			if ($l > $max_length) {$max_length = $l;}
			if ($num_reads{$read} > $max_cov) {$max_cov = $num_reads{$read};}
			
		}
	close FILE;
	
	
	print br;
	$histo_max = 0;
	for ($x = 1; $x < @histo; $x++) {
		if ($histo[$x] > $histo_max) { $histo_max = $histo[$x];}
	}
	
	$histo_adjust = $histo_max/100;
	
	for ($x = 1; $x < @histo; $x++) {
		#if ($histo[$x] > 0) {
			$b = 500 * $x;
			print "$b ";
			$ticks = int($histo[$x]/$histo_adjust);
			for ($y = 0; $y < $ticks; $y++) {
				print "*";
			}
			print " $histo[$x]\n";
		#}
	}


	
  	exit(0);
	
  	
  	
 
 
 sub revcomp {
  my $dna = @_[0];
  my $revcomp = reverse($dna);

  $revcomp =~ tr/ACGTacgt/TGCAtgca/;

  return $revcomp;
}

sub degen {
	my $dna = @_[0];
 	my $len = length($dna);
 	my $letter = "";
 	my @degs = ();
 	my @unique_degs = ();
 	my $deg = "";
 	my $left_side = "";
 	my $right_side = "";
 	my %seen =() ;

	for ($letter = 0; $letter < $len; $letter++) {
		$left_side = substr($dna,0,$letter);
		$right_side = substr($dna,$letter+1);
		$deg = $left_side . "A" . $right_side;
		push @degs, $deg;
		$deg = $left_side . "T" . $right_side;
		push @degs, $deg;
		$deg = $left_side . "C" . $right_side;
		push @degs, $deg;
		$deg = $left_side . "G" . $right_side;
		push @degs, $deg;
	}
	@unique_degs = grep { ! $seen{$_}++ } @degs ;	    

  return @unique_degs;
}
